# Supplementary material
Source: MDPI journal article supplement (https://www.mdpi.com/1424-2818/13/7/283)
Supplement: s1 [file s1]

***Barbonymus altus* (Günther, 1868)**

***altus*, *Barbus*** Günther [A.] 1868:119 [Catalogue of the fishes in the British Museum v. 7; ref. [1990](#)] Chao Phya River, Thailand. Syntypes: (orig. at least 4) BMNH 1862.11.1.241 (1). Type catalog: Monkolprasit 1969:11 [ref. [25088](#)]. •Valid as *Barbodes altus* (Günther 1868) -- (Rainboth 1996:95 [ref. [22772](#)], Doi 1997:3 [ref. [22832](#)], Kottelat 1998:25 [ref. [23436](#)]). •Valid as *Barbonymus altus* (Günther 1868) -- (Kottelat 2001:40 [ref. [25780](#)], Gante et al. 2008:1091 [ref. [29529](#)], Kottelat 2013:80 [ref. [32989](#)], Ng et al. 2019:522 [ref. [36606](#)]). **Current status:** Valid as *Barbonymus altus* (Günther 1868). Cyprinidae: Cyprininae. Distribution: Mekong, Chao Phraya basins, Xe Bangfai (Laos), Malaya (Malaysia). Habitat: freshwater.

***foxi*, *Barbus*** Fowler [H. W.] 1937:188, Figs. 144-145 [Proceedings of the Academy of Natural Sciences of Philadelphia v. 89; ref. [1425](#)] Mekong River at Kemrat [Kemarot], Thailand. Holotype: ANSP 68135. Paratypes: ANSP 68136 (1). Type catalog: Monkolprasit 1969:12 [ref. [25088](#)], Böhlke 1984:76 [ref. [13621](#)]. •Synonym of *Barbodes altus* (Günther 1868) -- (Rainboth 1996:95 [ref. [22772](#)]). •Valid as *Puntius foxi* (Fowler 1937) -- (Vu & Nguyen 1997:26 [ref. [26438](#)]). •Valid as *Barbodes foxi* (Fowler 1937) -- (Doi 1997:3 [ref. [22832](#)]). •Synonym of *Barbonymus altus* (Günther 1868) -- (Kottelat 2001:40 [ref. [25780](#)], Kottelat 2013:80 [ref. [32989](#)]). **Current status:** Synonym of *Barbonymus altus* (Günther 1868). Cyprinidae: Cyprininae. Habitat: freshwater.

***Barbonymus balleroides* (Valenciennes, in Cuvier & Valenciennes, 1842)**

***amblycephalus*, *Barbus*** Bleeker [P.] 1855:166 [Natuurkundig Tijdschrift voor Nederlandsch Indië v. 8 (no. 1); ref. [16837](#)] Rivers, Pengaron, southeastern Borneo, Indonesia. Holotype (?): BMNH 1866.5.2.197. Bleeker specimen: BMNH 1866.5.2.197 (1), possible holotype. •Synonym of *Barbonymus balleroides* (Valenciennes 1842) -- (Kottelat 2013:80 [ref. [32989](#)]). **Current status:** Synonym of *Barbonymus balleroides* (Valenciennes 1842). Cyprinidae: Cyprininae. Habitat: freshwater.

***balleroides*, *Barbus*** Valenciennes [A.] in Cuvier & Valenciennes 1842:158 [Histoire naturelle des poissons v. 16; ref. [1009](#)] Indo-Australian area [not Suriname]. Holotype (unique): MNHN 0000-3394. Type catalog: Bertin & Estève 1948:25 [ref. [19574](#)]. •Valid as *Barbodes balleroides* (Valenciennes 1842) -- (Kottelat et al. 1993:32 [ref. [23448](#)], Kottelat & Lim 1995:229 [ref. [23210](#)], Doi 1997:3 [ref. [22832](#)], Martin-Smith & Tan 1998:580 [ref. [23647](#)]). •Valid as *Barbonymus* aff. *balleroides* (Valenciennes 1842) -- (Kottelat & Widjanarti 2005:148 [ref. [28284](#)]). •Valid as *Barbonymus balleroides* (Valenciennes 1842) -- (Kottelat 2013:80 [ref. [32989](#)], Sulaiman et al. 2018:27 [ref. [35802](#)], Wilkinson & Tan 2018:598 [ref. [36226](#)]). **Current status:** Valid as *Barbonymus balleroides* (Valenciennes 1842). Cyprinidae: Cyprininae. Distribution: Southeastern Asia. Habitat: freshwater.

***bramoides*, *Barbus*** Valenciennes [A.] in Cuvier & Valenciennes 1842:160 [Histoire naturelle des poissons v. 16; ref. [1009](#)] Java, Indonesia. Syntypes and Valenciennes specimens: ?SMF 2584 [ex RMNH] (1, dry), 2595 [ex RMNH] (1, dry). Type information: Roberts 1993:21 [ref. [21799](#)]. Simultaneous synonym of *balleroides* and *bramoides*; Pellegrin 1934:24 gives preference to *balleroides*. •Valid as *Puntius bramoides* (Valenciennes 1842) -- (Roberts 1989:61 [ref. [6439](#)], Roberts 1993:21 [ref. [21799](#)]). •Synonym of *Barbonymus balleroides* (Valenciennes 1842) -- (Kottelat 2013:80 [ref. [32989](#)]). **Current status:** Synonym of *Barbonymus balleroides* (Valenciennes 1842). Cyprinidae: Cyprininae. Distribution: Southeastern Asia. Habitat: freshwater.

***erythropterus*, *Barbus*** Bleeker [P.] 1849:15 [Verhandelingen van het Bataviaasch Genootschap van Kunsten en Wetenschappen. v. 23 (no. 12); ref. [16883](#)] Kalimas River, Surabaya, Java, Indonesia. Syntypes and/or Bleeker specimens: BMNH 1866.5.2.195 (1), RMNH 7016 (1), 10346 [ex RMNH 7016] (5). Type catalog: Bertin & Estève 1948:27-28 [ref. [19574](#)]. •Synonymy of *Barbonymus balleroides* (Valenciennes 1842) -- (Kottelat 2013:80 [ref. [32989](#)]). **Current status:** Synonym of *Barbonymus balleroides* (Valenciennes 1842). Cyprinidae: Cyprininae. Habitat: freshwater.

***hypsilonotus*, *Barbus*** Valenciennes [A.] (ex Kuhl & van Hasselt) in Cuvier & Valenciennes 1842:168 [Histoire naturelle des poissons v. 16; ref. [1009](#)] Java, Indonesia. Holotype (unique): ?BMNH 1866.5.2.187 or ?RMNH 7022. Simultaneous synonym of *haleroides*; Kottelat (2013:80 [ref. [32989](#)]) gives precedence to *balleroides*. •Synonym of *Puntius bramoides* (Valenciennes 1842) -- (Roberts 1993:21 [ref. [21799](#)]). •Synonym of *Barbonymus ballereides* (Valenciennes 1842) -- (Kottelat 2013:80

[ref. [32989](#)]). **Current status:** Synonym of *Barbonymus balleroides* (Valenciennes 1842). Cyprinidae: Cyprininae. Habitat: freshwater.

**macrophthalmus, Barbus** Bleeker [P.] 1855:404 [Natuurkundig Tijdschrift voor Nederlandsch Indië v. 9 (no. 3); ref. [16848](#)] Tjiliwong River, Jakarta, Java; Kalimas River, Surabaya, Indonesia. Syntypes: (5) BMNH 1866.5.2.181 (1) Java; RMNH 7021 (1), 10368 (3). •Synonym of *Barbonymus balleroides* (Valenciennes 1842) -- (Kottelat 2013:80 [ref. [32989](#)]). **Current status:** Synonym of *Barbonymus balleroides* (Valenciennes 1842). Cyprinidae: Cyprininae. Habitat: freshwater.

**wadon, Barbus** Bleeker [P.] 1849:14 [Verhandelingen van het Bataviaasch Genootschap van Kunsten en Wetenschappen. v. 23 (no. 12); ref. [16883](#)] Kalimas River, Surabaya, Java, Indonesia. Syntypes: ?SMNS 10588 (1). Type catalog: Fricke 1991:12 [ref. [13474](#)], Fricke 2005:31 [ref. [29864](#)]. •Synonym of *Barbonymus balleroides* (Valenciennes 1842) -- (Kottelat 2013:80 [ref. [32989](#)]). **Current status:** Synonym of *Barbonymus balleroides* (Valenciennes 1842). Cyprinidae: Cyprininae. Habitat: freshwater.

### ***Barbonymus belinka* (Bleeker, 1860)**

**belinka, Systomus** Bleeker [P.] 1860:321 [Acta Societatis Regiae Scientiarum Indo-Neêrlandicae v. 7 (art. 2); ref. [380](#)] Padang, Solok, and Sinkara, Sumatra, Indonesia. Syntypes: (9) BMNH 1866.5.2.192 (1) Sumatra; ?NMV 45938 (1); RMNH 7020 (1), 7132 (1). Original lists Cypr. Tab. XXXI, fig. 1, which was published in 1864 as Cypr. Pl. 37 (fig. 1). •Valid as *Barboides belinka* (Bleeker 1860) -- (Kottelat et al. 1993:32 [ref. [23448](#)], Doi 1997:3 [ref. [22832](#)]). •Valid as *Barbonymus belinka* (Bleeker 1860) -- (Kottelat 2013:81 [ref. [32989](#)]). **Current status:** Valid as *Barbonymus belinka* (Bleeker 1860). Cyprinidae: Cyprininae. Distribution: Sumatra and Malaysia. Habitat: freshwater.

### ***Barbonymus collingwoodii* (Günther, 1868)**

**boulengerii, Barbus** Popta [C. M. L.] 1905:172 [Notes from the Leyden Museum v. 25 (no. 4) (art. 15); ref. [3549](#)] Bongan River, Howong River, and Bo River, Borneo. Syntypes: (6) RMNH 7598-7600 (3, 1, 2). •Synonym of *Puntius collingwoodii* (Günther 1868) -- (Roberts 1989:62 [ref. [6439](#)]). •Synonym of *Barbonymus collingwoodii* (Günther 1868) -- (Kottelat 2013:81 [ref. [32989](#)]). **Current status:** Synonym of *Barbonymus collingwoodii* (Günther 1868). Cyprinidae: Cyprininae. Habitat: freshwater.

**collingwoodii, Barbus** Günther [A.] 1868:483 [Catalogue of the fishes in the British Museum v. 7; ref. [1990](#)] Sarawak state, Borneo, East Malaysia. Holotype (unique): BMNH 1868.1.27.15. •Valid as *Puntius collingwoodii* (Günther 1868) -- (Roberts 1989:62 [ref. [6439](#)]). •Valid as *Barbodes collingwoodii* (Günther 1868) -- (Kottelat et al. 1993:32 [ref. [23448](#)], Kottelat & Lim 1995:229 [ref. [23210](#)], Doi 1997:3 [ref. [22832](#)]). •Valid as *Barbonymus collingwoodii* (Günther 1868) -- (Kottelat & Widjanarti 2005:148 [ref. [28284](#)], Parenti & Lim 2005:179 [ref. [28285](#)], Gante et al. 2008:1091 [ref. [29529](#)], Kottelat 2013:81 [ref. [32989](#)], Sulaiman et al. 2018:27 [ref. [35802](#)]). **Current status:** Valid as *Barbonymus collingwoodii* (Günther 1868). Cyprinidae: Cyprininae. Distribution: Borneo. Habitat: freshwater.

### ***Barbonymus gonionotus* (Bleeker, 1849)**

**gonionotus, Barbus** Bleeker [P.] 1849:15 [Verhandelingen van het Bataviaasch Genootschap van Kunsten en Wetenschappen. v. 23 (no. 12); ref. [16883](#)] Kalimas River, Surabaya, Java, Indonesia. Holotype (unique): BMNH 1866.5.2.183. •Valid as *Puntius gonionotus* (Bleeker 1849) -- (Vu & Nguyen 1997:26 [ref. [26438](#)], Shrestha 2008:77 [ref. [29923](#)]). •Valid as *Barbodes gonionotus* (Bleeker 1849) -- (Kottelat et al. 1993:33 [ref. [23448](#)], Rainboth 1996:95 [ref. [22772](#)], Doi 1997:3 [ref. [22832](#)], Kottelat 1998:25 [ref. [23436](#)]). •Valid as *Barbonymus gonionotus* (Bleeker 1849) -- (Freyhof et al. 2000:94 [ref. [25184](#)], Kottelat 2001:40 [ref. [25780](#)], Parenti & Lim 2005:179 [ref. [28285](#)], Gante et al. 2008:1091 [ref. [29529](#)], Tan & Kottelat 2009:28 [ref. [30261](#)], Kottelat 2013:81 [ref. [32989](#)], Yang et al. 2015:99 [ref. [33694](#)] in Cyprininae, tribe Poropuntiini, Kottelat 2015:40 [ref. [33971](#)], Zhang et al. 2016:89 [ref. [34477](#)], Miesen et al. 2016:82 [ref. [34492](#)], Ng et al. 2019:522 [ref. [36606](#)], Ren et al. 2020:[6] [ref. [37805](#)]). **Current status:** Valid as *Barbonymus gonionotus* (Bleeker 1849). Cyprinidae: Cyprininae. Distribution: Southeast Asia [introduced in some areas]. Habitat: freshwater.

**javanicus, Barbus** Bleeker [P.] 1855:403 [Natuurkundig Tijdschrift voor Nederlandsch Indië v. 9 (no. 3); ref. [16848](#)] Tjitarum and Bekassi rivers, Jarkarta; Gempol River, Pasuruan, Indonesia. Syntypes: (30) BMNH 1866.5.2.196 (1); NMV 45903 (1); RMNH 5218 (1), 8035 [ex 5218] (2). •Synonym of

*Barbonymus gonionotus* (Bleeker 1849) -- (Kottelat 2001:40 [ref. [25780](#)], Kottelat 2013:81 [ref. [32989](#)]). **Current status:** Synonym of *Barbonymus gonionotus* (Bleeker 1849). Cyprinidae: Cyprininae. Habitat: freshwater.

**jolamarki, Puntius (Barbodes)** Smith [H. M.] 1934:310 [Journal of the Siam Society, Natural History Supplement v. 9 (no. 3); ref. [4052](#)] Chao Phraya [Phya] River at Bang-sorn, Bangkok, Thailand. Holotype (unique): whereabouts unknown. Type catalog: Monkolprasit 1969:12 [ref. [25088](#)] as *jolamaki*.

•Synonym of *Barbodes gonionotus* (Bleeker 1849) -- (Rainboth 1996:95 [ref. [22772](#)]). •Valid as *Barbodes jolamarki* (Smith 1934) -- (Doi 1997:3 [ref. [22832](#)]). •Synonym of *Barbonymus gonionotus* (Bleeker 1849) -- (Kottelat 2001:40 [ref. [25780](#)], Kottelat 2013:81 [ref. [32989](#)]). **Current status:** Synonym of *Barbonymus gonionotus* (Bleeker 1849). Cyprinidae: Cyprininae. Habitat: freshwater.

**koilometopon, Barbus** Bleeker [P.] 1857:347 [Natuurkundig Tijdschrift voor Nederlandsch Indië v. 13 (no. 2); ref. [16868](#)] Java, Indonesia. Syntypes: (2) BMNH 1866.5.2.180 (1), 1867.11.28.80 (1). •Valid as *Barbonymus gonionotus* (Bleeker 1849) -- (Kottelat 2013:81 [ref. [32989](#)]). **Current status:** Synonym of *Barbonymus gonionotus* (Bleeker 1849). Cyprinidae: Cyprininae. Habitat: freshwater.

**viehoeveri, Puntius** Fowler [H. W.] 1943:26, Fig. [The Fish Culturist v. 23 (no. 4); ref. [17877](#)] Bangkok, Thailand. Holotype (unique): ANSP 70615. Type catalog: Monkolprasit 1969:13 [ref. [25088](#)], Böhlke 1984:94 [ref. [13621](#)]. •Synonym of *Barbodes gonionotus* (Bleeker 1850) -- (Rainboth 1996:95 [ref. [22772](#)]). •Synonym of *Barbonymus gonionotus* (Bleeker 1849) -- (Kottelat 2001:40 [ref. [25780](#)], Kottelat 2013:81 [ref. [32989](#)]). **Current status:** Synonym of *Barbonymus gonionotus* (Bleeker 1849). Cyprinidae: Cyprininae. Habitat: freshwater.

#### ***Barbonymus mahakkamensis* (Ahl, 1922)**

**mahakkamensis, Barbus** Ahl [E.] 1922:34 [Sitzungsberichte der Gesellschaft Naturforschender Freunde zu Berlin 1922 (no. 1-2); ref. [15335](#)] Mahakam River, eastern Kalimantan Prov, eastern Borneo. Syntypes: ZMB 20533 (5). Types mentioned: Paepke 1995:90 [ref. [21847](#)]. •Valid as *Barbodes mahakkamensis* (Ahl 1922) -- (Doi 1997:3 [ref. [22832](#)] as *mahakkammensis*). •Valid as *Barbonymus mahakkamensis* (Ahl 1922) -- (Kottelat 2013:81 [ref. [32989](#)]). **Current status:** Valid as *Barbonymus mahakkamensis* (Ahl 1922). Cyprinidae: Cyprininae. Distribution: Borneo. Habitat: freshwater.

#### ***Barbonymus platysoma* (Bleeker, 1855)**

**platysoma, Barbus** Bleeker [P.] 1855:404 [Natuurkundig Tijdschrift voor Nederlandsch Indië v. 9 (no. 3); ref. [16848](#)] Surakarta, central Java, Indonesia. Holotype (unique): BMNH 1866.5.2.184. Also spelled *platijisoma* by Bleeker on p. 404. •Valid as *Barbodes platysoma* (Bleeker 1855) -- (Kottelat et al. 1993:33 [ref. [23448](#)], Doi 1997:3 [ref. [22832](#)]). •Valid as *Barbonymus platysoma* (Bleeker 1849) -- (Kottelat 2013:81 [ref. [32989](#)]). **Current status:** Valid as *Barbonymus platysoma* (Bleeker 1855). Cyprinidae: Cyprininae. Distribution: Indonesia. Habitat: freshwater.

#### ***Barbonymus schwanefeldii* (Bleeker 1854)**

**rubra, Barbus schwanefeldi** var. Vaillant [L. L.] 1902:95 [Notes from the Leyden Museum v. 24 (note 1); ref. [4490](#)] Kalamantan Timor, Mahakam river at Tepoe, Borneo. Syntypes: (4). •Synonym of *Puntius schwanefeldii* (Bleeker 1854) -- (Roberts 1989:66 [ref. [6439](#)]). •Synonym of *Barbonymus schwanefeldii* (Bleeker 1854) -- (Kottelat 2013:81 [ref. [32989](#)]). **Current status:** Synonym of *Barbonymus schwanefeldii* (Bleeker 1854). Cyprinidae: Cyprininae. Habitat: freshwater.

**schwanefeldii, Barbus** Bleeker [P.] 1854:517 [Natuurkundig Tijdschrift voor Nederlandsch Indië v. 5 (no. 3); ref. [5965](#)] Lake Singkara, western Sumatra; Moara kompeh, Palembang, eastern Sumatra; Pangabuang, Lampong, southeastern Sumatra, Indonesia. Syntypes and/or Bleeker specimens: (8) BMNH 1866.5.2.178 (1), RMNH 7013 (1), 10322 (3). Type catalog: Bertin & Estève 1948:28 [ref. [19574](#)]. Name later spelled *schwanefeldii* by Bleeker and authors (perhaps an unjustified emendation). Species name spelled *schwanefeldi* by Maxwell 1921:89 [ref. [30344](#)]. Kottelat 2013:81 spells it without a second 'n' as per Code art. 32.5.1. •Valid as *Puntius schwanefeldii* (Bleeker 1854) -- (Roberts 1989:66 [ref. [6439](#)], Lim et al. 1990:37 [ref. [16753](#)]). •Valid as *Barbodes schwanefeldii* (Bleeker 1854) -- (Kottelat et al. 1993:33 [ref. [23448](#)], Kottelat & Lim 1995:229 [ref. [23210](#)], Doi 1997:3 [ref. [22832](#)], Kottelat 1998:25 [ref. [23436](#)] as *schwanefeldii*, Ng & Tan 1999:352 [ref. [24159](#)], Fuller et al. 1999:143 [ref. [25838](#)] as

*schwanefeldii*). •Valid as *Barbonymus schwane(n)feldii* (Bleeker 1854) -- (Kottelat 1999:595 [ref. [24610](#)], Freyhof et al. 2000:94 [ref. [25184](#)], Kottelat 2001:40 [ref. [25780](#)], Kottelat & Widjanarti 2005:148 [ref. [28284](#)], Parenti & Lim 2005:179 [ref. [28285](#)], Gante et al. 2008:10989 [ref. [29529](#)], Kottelat 2013:81 [ref. [32989](#)] as *schwanefeldii*, Kottelat 2015:40 [ref. [33971](#)] as *schwanefeldii*, Lorenzoni et al. 2019:251 [ref. [37108](#)], Ng et al. 2019:522 [ref. [36606](#)] as *schwanefeldii*). **Current status:** Valid as *Barbonymus schwanefeldii* (Bleeker 1854). Cyprinidae: Cyprininae. Distribution: Southeastern Asia. Introduced in Iberian Peninsula, Italy. Habitat: freshwater.

***Barbonymus strigatus* (Boulenger, 1894)**

***strigatus*, *Barbus*** Boulenger [G. A.] 1894:247 [Annals and Magazine of Natural History (Series 6) v. 13 (no. 75) (art. 26); ref. [535](#)] Sungai Bongon, Sabah, Borneo, Malaysia. Holotype (unique): BMNH 1893.5.30.56. •Valid as *Barbodes strigatus* (Boulenger 1894) -- (Kottelat et al. 1993:33 [ref. [23448](#)], Doi 1997:3 [ref. [22832](#)]). •Valid as *Barbonymus strigatus* (Boulenger 1894) -- (Kottelat 2013:81 [ref. [32989](#)]). **Current status:** Valid as *Barbonymus strigatus* (Boulenger 1894). Cyprinidae: Cyprininae. Distribution: Sabah, Borneo. Habitat: freshwater.

***Barbonymus sunieri* (Weber & de Beaufort, 1916)**

***sunieri*, *Puntius*** Weber [M.] & de Beaufort [L. F.] 1916:199 [Fishes Indo-Australian Archipelago v. 3; ref. [4604](#)] Sedalit River, affluent of Sambakung River, northeastern Borneo. Holotype (unique): ZMA 112673. Type catalog: Nijssen et al. 1982:33 [ref. [19236](#)]. •Valid as *Barbodes sunieri* (Weber & de Beaufort 1916) -- (Kottelat et al. 1993:33 [ref. [23448](#)], Doi 1997:3 [ref. [22832](#)]). •Valid as *Barbonymus sunieri* (Weber & de Beaufort 1894) -- (Kottelat 2013:81 [ref. [32989](#)]). **Current status:** Valid as *Barbonymus sunieri* (Weber & de Beaufort 1916). Cyprinidae: Cyprininae. Distribution: Borneo. Habitat: freshwater.
